# Supplementary material for: Clinical Inertia in Individualising Care for Diabetes: Is There Time to do More in Type 2 Diabetes?
Source: Springer Nature journal article supplement (doi:10.1007/s13300-014-0077-8), 2014-08-11
Supplement: 13300_2014_77_MOESM1_ESM.pdf [file 13300_2014_77_MOESM1_ESM.pdf]

- Clinical inertia is defined as the failure to establish appropriate targets and escalate treatment to achieve treatment goals.
- It accounts for a significant proportion of failure to achieve targets in the management of diabetes.
- It potentially contributes to up to 200,000 adverse diabetes related outcomes per year.
- Good education, clear treatment strategy and more time for interaction between physician and patients appears to reduce clinical inertia by observing the “placebo effect” of clinical trials.
- More work is required to determine whether these elements can benefit patients in real-life health care setting.

This summary slide represents the opinions of the authors. For a full list of acknowledgments and conflicts of interest for all authors of this article, please see the full text online. Copyright © The Authors 2014. Creative Commons Attribution Noncommercial License (CC BY-NC).
